# Supplementary material for: Effect of Culture Conditions on Fatty Acid Profiles of Bacteria and Lipopolysaccharides of the Genus Pseudomonas—GC-MS Analysis on Ionic Liquid-Based Column
Source: MDPI journal article supplement (doi:10.3390/molecules27206930), 2022-10-15
Supplement: s1 [file s1]

Supplementary

## **Effect of culture conditions on fatty acid profiles of bacteria and lipopolysaccharides of the genus *Pseudomonas* – GC-MS analysis using an ionic liquid-based column**

**Emerencia Mező<sup>1</sup>, Fruzsina Hartmann-Balogh<sup>1</sup>, Ibolya Madarászné Horváth<sup>1</sup>, Anita Bufa<sup>1</sup>, Tamás Marosvölgyi<sup>1</sup>, Béla Kocsis<sup>2</sup> and Lilla Makszin<sup>1,\*</sup>**

<sup>1</sup> Institute of Bioanalysis, Medical School, and Szentágotthai Research Center, University of Pécs

<sup>2</sup> Department of Medical Microbiology and Immunology, Medical School, University of Pécs

\* Correspondence: [lilla.makszin@aok.pte.hu](mailto:lilla.makszin@aok.pte.hu)

**Table S1** Calibration curve equations, coefficient of determinations, intra- and interday repeatability, system suitability and average accuracy percentage of the BAMEs, determined in the BAME CP Mix standard mixture.

| Fatty acids | Calibration curve estimation <sup>a</sup> | Coefficient of determination (R <sup>2</sup> ) <sup>b</sup> | Repeatability                |                              | System suitability <sup>e</sup> |                      | Average accuracy <sup>f</sup> (%) |
|-------------|-------------------------------------------|-------------------------------------------------------------|------------------------------|------------------------------|---------------------------------|----------------------|-----------------------------------|
|             |                                           |                                                             | Intraday <sup>c</sup> (%RSD) | Interday <sup>d</sup> (%RSD) | Retention time (%RSD)           | Concentration (%RSD) |                                   |
| C11:0       | y = 7.96E+06x + 1.08E+05                  | 0.9951                                                      | 4.53                         | 3.81                         | 0.03                            | 4.25                 | 100.9                             |
| C12:0       | y = 2.61E+07x – 1.35E+05                  | 0.9975                                                      | 3.85                         | 3.07                         | 0.02                            | 5.60                 | 98.7                              |
| C13:0       | y = 4.91E+07x – 8.95E+05                  | 0.9923                                                      | 2.15                         | 2.21                         | 0.02                            | 5.68                 | 99.5                              |
| C14:0       | y = 6.65E+07x – 8.25E+05                  | 0.9894                                                      | 2.80                         | 3.25                         | 0.02                            | 7.79                 | 100.6                             |
| i C15:0     | y = 7.20E+07x – 1.91E+06                  | 0.9896                                                      | 3.00                         | 3.31                         | 0.02                            | 8.70                 | 100.6                             |
| ai C15:0    | y = 6.92E+07x – 1.71E+06                  | 0.9946                                                      | 2.69                         | 2.50                         | 0.02                            | 9.70                 | 100.5                             |
| C15:0       | y = 7.66E+07x – 2.00E+06                  | 0.9921                                                      | 4.36                         | 3.84                         | 0.02                            | 6.25                 | 100.4                             |
| i C16:0     | y = 7.87E+07x – 2.18E+06                  | 0.9899                                                      | 4.16                         | 4.65                         | 0.02                            | 8.66                 | 101.2                             |
| C16:0       | y = 8.46E+07x + 5.15E+05                  | 0.9929                                                      | 4.23                         | 3.78                         | 0.02                            | 5.59                 | 99.9                              |
| i C17:0     | y = 8.59E+07x – 1.56E+06                  | 0.9994                                                      | 2.14                         | 2.74                         | 0.02                            | 5.28                 | 99.5                              |
| C16:1c      | y = 7.57E+07x – 1.39E+06                  | 0.9975                                                      | 2.41                         | 3.76                         | 0.01                            | 5.81                 | 99.8                              |
| C17:0       | y = 8.60E+07x - 5.36E+05                  | 0.9981                                                      | 2.42                         | 2.33                         | 0.02                            | 4.61                 | 98.9                              |
| C17:0Δ      | y = 7.85E+07x – 1.77E+06                  | 0.9974                                                      | 4.02                         | 2.99                         | 0.01                            | 5.79                 | 100.8                             |
| C18:0       | y = 9.48E+07x – 2.86E+06                  | 0.9975                                                      | 3.64                         | 2.67                         | 0.02                            | 9.68                 | 101.0                             |
| 2-OH C10:0  | y = 1.49E+07x – 1.63E+05                  | 0.9930                                                      | 4.47                         | 3.49                         | 0.01                            | 5.43                 | 100.2                             |
| C18:1t      | y = 9.06E+07x – 3.15E+06                  | 0.9949                                                      | 6.39                         | 5.01                         | 0.02                            | 9.19                 | 101.4                             |
| C18:1c      | y = 8.91E+07x – 3.17E+06                  | 0.9962                                                      | 5.18                         | 5.95                         | 0.02                            | 9.59                 | 102.0                             |
| C19:0       | y = 9.52E+07x – 2.25E+06                  | 0.9626                                                      | 6.43                         | 6.26                         | 0.02                            | 6.39                 | 99.6                              |
| C19:0Δ      | y = 8.71E+07x – 2.28E+06                  | 0.9991                                                      | 5.14                         | 6.05                         | 0.02                            | 9.02                 | 100.4                             |
| C20:0       | y = 1.21E+08x – 9.24E+06                  | 0.9793                                                      | 5.54                         | 5.29                         | 0.03                            | 8.17                 | 104.7                             |
| C18:2cc     | y = 5.72E+07x + 4.51E+06                  | 0.9511                                                      | 4.48                         | 3.20                         | 0.01                            | 5.54                 | 91.9                              |
| 2-OH C12:0  | y = 4.11E+07x – 1.49E+06                  | 0.9944                                                      | 5.15                         | 5.64                         | 0.01                            | 4.08                 | 102.2                             |
| 3-OH C12:0  | y = 7.40E+07x – 2.42E+06                  | 0.9975                                                      | 7.15                         | 6.35                         | 0.02                            | 4.12                 | 101.0                             |
| 2-OH C14:0  | y = 5.73E+07x – 1.17E+06                  | 0.9956                                                      | 4.36                         | 4.34                         | 0.01                            | 5.44                 | 101.0                             |
| 3-OH C14:0  | y = 6.95E+07x – 3.63E+06                  | 0.9964                                                      | 4.30                         | 4.95                         | 0.02                            | 5.72                 | 101.3                             |
| 2-OH C16:0  | y = 6.63E+07x – 1.10E+06                  | 0.9954                                                      | 5.34                         | 5.64                         | 0.01                            | 5.33                 | 101.2                             |

a. The calibration curve established from three (n = 3) complete analyses of five calibration solutions (0.1, 0.25, 0.5, 0.75 and 1 mg mL<sup>-1</sup> concentrations prepared in acetone) in a day.

b. Calibration range was from 0.1 mg mL<sup>-1</sup> to 1 mg mL<sup>-1</sup>.

c. The value of %RSD of concentration established from three (n = 3) complete analyses of each sample in a day. The concentration was 0.75 mg mL<sup>-1</sup>.

d. The value of %RSD of concentration established from three complete analyses repeated tree consecutive days (n = 9). The concentration was 0.75 mg mL<sup>-1</sup>.

e. The value of %RSD of retention time and concentration established from seven (n = 7) complete analyses of each sample in a day. The concentration was 0.5 mg mL<sup>-1</sup>.

f. Percentage of average accuracy of concentration established from three (n = 3) complete analyses of five calibration solutions in a day.

**Table S2** Limit of detection (LOD) and limit of quantification (LOQ) values for components in the BAME CP Mix determined by GC–MS using the optimized method for the SLB-IL111 GC column. The optimized experimental conditions are detailed in Materials and Methods.

| Fatty acids    | LOD ( $\mu\text{g mL}^{-1}$ ) <sup>a</sup> | LOQ ( $\mu\text{g mL}^{-1}$ ) <sup>b</sup> |
|----------------|--------------------------------------------|--------------------------------------------|
| C11:0          | 0.08                                       | 0.25                                       |
| C12:0          | 0.06                                       | 0.18                                       |
| C13:0          | 0.10                                       | 0.31                                       |
| C14:0          | 0.12                                       | 0.37                                       |
| i C15:0        | 0.12                                       | 0.37                                       |
| ai C15:0       | 0.09                                       | 0.26                                       |
| C15:0          | 0.11                                       | 0.32                                       |
| i C16:0        | 0.12                                       | 0.36                                       |
| C16:0          | 0.10                                       | 0.30                                       |
| i C17:0        | 0.03                                       | 0.09                                       |
| C16:1c         | 0.06                                       | 0.18                                       |
| C17:0          | 0.05                                       | 0.15                                       |
| C17:0 $\Delta$ | 0.06                                       | 0.18                                       |
| C18:0          | 0.06                                       | 0.18                                       |
| 2-OH C10:0     | 0.10                                       | 0.30                                       |
| C18:1t         | 0.08                                       | 0.25                                       |
| C18:1c         | 0.07                                       | 0.22                                       |
| C19:0          | 0.07                                       | 0.20                                       |
| C19:0 $\Delta$ | 0.04                                       | 0.11                                       |
| C20:0          | 0.17                                       | 0.52                                       |
| C18:2cc        | 0.27                                       | 0.80                                       |
| 2-OH C12:0     | 0.09                                       | 0.27                                       |
| 3-OH C12:0     | 0.06                                       | 0.18                                       |
| 2-OH C14:0     | 0.08                                       | 0.24                                       |
| 3-OH C14:0     | 0.07                                       | 0.21                                       |
| 2-OH C16:0     | 0.08                                       | 0.24                                       |

<sup>a</sup> The LOD values were measured at S/N ratio > 3.

<sup>b</sup> The LOQ values were measured at S/N ratio > 10.
